# Supplementary material
Source: PubMed Central journal article supplement (PMC6694214)
Supplement: EMBJ-38-e101955-s001.pdf [file EMBJ-38-e101955-s001.pdf]

## APPENDIX

### **Sen1 is required for effective termination of RNA polymerase III transcription.**

Julieta Rivosecchi, Marc Larochelle, Camille Teste, Frédéric Grenier, Amélie Malapert, Emiliano P. Ricci, Pascal Bernard, François Bachand and Vincent Vanoosthuyse.

### TABLE OF CONTENTS

- **Appendix Table S1:** List of the proteins identified as protein partners of Flag-tagged Sen1 and Flag-tagged Dbl8.
- **Appendix Table S2:** List of fission yeast strains used in this study.
- **Appendix Table S3:** List of primers used in this study.
- **Appendix Figure S1:** The Sen1/Rpc37 co-immunoprecipitation is resistant to a benzonase treatment.
- **Appendix Figure S2:** Correlation analysis of ChIP-seq data from Sen1 and RNAP3 for different classes of genes.
- **Appendix Figure S3:** ChIP-qPCR analysis of Sen1 in the presence and in the absence of Dbl8.
- **Appendix Figure S4:** Lack of Sen1 results in modest transcription termination defects at *snu6*.
- **Appendix Figure S5:** RnhA expression does not change the proportion of read-through transcripts in the absence of Sen1.

**Appendix Table S1:** List of the proteins identified as protein partners of Flag-tagged Sen1 and Flag-tagged Dbl8 using mass-spectrometry analysis. The flag-tagged strains were expressed from the endogenous loci. The no-tag strain was used as negative control.

| no tag    |                                                                                                                                             |        |          |            |                   |            |          |          |
|-----------|---------------------------------------------------------------------------------------------------------------------------------------------|--------|----------|------------|-------------------|------------|----------|----------|
| Accession | Description                                                                                                                                 | Score  | Coverage | # Proteins | # Unique Peptides | # Peptides | MW [kDa] | calc. pl |
| P40847    | Switch-activating protein 1 OS=Schizosaccharomyces pombe (strain 972 / ATCC 24843) GN=sap1 PE=1 SV=2 - [SAP1_SCHPO]                         | 151,91 | 29,92    | 1          | 7                 | 7          | 29,1     | 7,88     |
| B5BP45    | Uncharacterized amino-acid permease C460.01c OS=Schizosaccharomyces pombe (strain 972 / ATCC 24843) GN=SPBC460.01c PE=3 SV=1 - [YP51_SCHPO] | 137,37 | 6,64     | 1          | 3                 | 3          | 62,7     | 6,68     |
| P78958    | Glyceraldehyde-3-phosphate dehydrogenase 1 OS=Schizosaccharomyces pombe (strain 972 / ATCC 24843) GN=tdh1 PE=1 SV=1 - [G3P1_SCHPO]          | 135,39 | 7,74     | 1          | 2                 | 2          | 35,8     | 6,70     |
| Q92372    | Replication factor A protein 1 OS=Schizosaccharomyces pombe (strain 972 / ATCC 24843) GN=ssb1 PE=1 SV=1 - [RFA1_SCHPO]                      | 129,17 | 9,36     | 1          | 5                 | 5          | 68,2     | 6,74     |
| O94514    | Nucleolar protein 56 OS=Schizosaccharomyces pombe (strain 972 / ATCC 24843) GN=nop56 PE=3 SV=1 - [NOP56_SCHPO]                              | 96,67  | 11,07    | 1          | 5                 | 5          | 55,4     | 8,90     |
| O13370    | ATP-dependent RNA helicase ded1 OS=Schizosaccharomyces pombe (strain 972 / ATCC 24843) GN=ded1 PE=1 SV=1 - [DED1_SCHPO]                     | 90,86  | 6,13     | 1          | 3                 | 3          | 69,7     | 8,50     |
| O14007    | H/ACA ribonucleoprotein complex subunit 4 OS=Schizosaccharomyces pombe (strain 972 / ATCC 24843) GN=cbf5 PE=3 SV=1 - [CBF5_SCHPO]           | 82,53  | 9,49     | 1          | 4                 | 4          | 53,1     | 8,97     |
| Q09781    | 40S ribosomal protein S1-A OS=Schizosaccharomyces pombe (strain 972 / ATCC 24843) GN=rps101 PE=3 SV=2 - [RS3A1_SCHPO]                       | 64,06  | 9,52     | 1          | 1                 | 2          | 28,5     | 9,99     |
| O94438    | 40S ribosomal protein S1-B OS=Schizosaccharomyces pombe (strain 972 / ATCC 24843) GN=rps102 PE=1 SV=3 - [RS3A2_SCHPO]                       | 60,46  | 14,29    | 1          | 2                 | 3          | 28,5     | 10,14    |
| O94754    | 40S ribosomal protein S18 OS=Schizosaccharomyces pombe (strain 972 / ATCC 24843) GN=rps18a PE=1 SV=1 - [RS18_SCHPO]                         | 58,56  | 15,13    | 1          | 2                 | 2          | 17,4     | 10,49    |
| P00332    | Alcohol dehydrogenase OS=Schizosaccharomyces pombe (strain 972 / ATCC 24843) GN=adh1 PE=1 SV=2 - [ADH_SCHPO]                                | 53,80  | 6,00     | 1          | 2                 | 2          | 37,4     | 6,93     |
| O14460    | Elongation factor 2 OS=Schizosaccharomyces pombe (strain 972 / ATCC 24843) GN=ef201 PE=1 SV=2 - [EF2_SCHPO]                                 | 53,60  | 2,85     | 1          | 2                 | 2          | 93,2     | 6,43     |
| Q09188    | ADP-ATP carrier protein OS=Schizosaccharomyces pombe (strain 972 / ATCC 24843) GN=anc1 PE=2 SV=1 - [ADT_SCHPO]                              | 50,60  | 6,52     | 1          | 2                 | 2          | 35,0     | 9,96     |

| Sen1-3flag |                                                                                                                                                |         |          |            |                   |            |          |          |
|------------|------------------------------------------------------------------------------------------------------------------------------------------------|---------|----------|------------|-------------------|------------|----------|----------|
| Accession  | Description                                                                                                                                    | Score   | Coverage | # Proteins | # Unique Peptides | # Peptides | MW [kDa] | calc. pl |
| Q92355     | Helicase sen1 OS=Schizosaccharomyces pombe (strain 972 / ATCC 24843) GN=sen1 PE=1 SV=1 - [SEN1_SCHPO]                                          | 2066,75 | 39,18    | 1          | 63                | 63         | 192,4    | 7,05     |
| O94666     | DNA-directed RNA polymerase III subunit rpc1 OS=Schizosaccharomyces pombe (strain 972 / ATCC 24843) GN=rpc1 PE=2 SV=1 - [RPC1_SCHPO]           | 1159,97 | 39,43    | 1          | 43                | 43         | 157,5    | 7,71     |
| Q10233     | DNA-directed RNA polymerase III subunit RPC2 OS=Schizosaccharomyces pombe (strain 972 / ATCC 24843) GN=rpc2 PE=2 SV=1 - [RPC2_SCHPO]           | 873,66  | 42,66    | 1          | 39                | 39         | 130,2    | 8,41     |
| O74883     | DNA-directed RNA polymerase III subunit rpc5 OS=Schizosaccharomyces pombe (strain 972 / ATCC 24843) GN=rpc37 PE=3 SV=1 - [RPC5_SCHPO]          | 627,02  | 57,85    | 1          | 14                | 14         | 27,4     | 6,57     |
| Q9US25     | Chromodomain helicase hrp1 OS=Schizosaccharomyces pombe (strain 972 / ATCC 24843) GN=hrp1 PE=1 SV=1 - [HRP1_SCHPO]                             | 608,38  | 27,68    | 1          | 31                | 31         | 158,5    | 5,83     |
| Q9C106     | DNA-directed RNA polymerase III subunit rpc3 OS=Schizosaccharomyces pombe (strain 972 / ATCC 24843) GN=rpc82 PE=1 SV=1 - [RPC3_SCHPO]          | 552,12  | 36,55    | 1          | 22                | 22         | 68,3     | 7,61     |
| O94616     | DNA-directed RNA polymerases I and III subunit RPAC1 OS=Schizosaccharomyces pombe (strain 972 / ATCC 24843) GN=rpc40 PE=3 SV=1 - [RPAC1_SCHPO] | 294,39  | 40,23    | 1          | 11                | 11         | 39,1     | 5,63     |
| P50522     | Elongation factor 1-alpha OS=Schizosaccharomyces pombe (strain 972 / ATCC 24843) GN=tef1a PE=1 SV=2 - [EF1A1_SCHPO]                            | 247,65  | 20,65    | 2          | 9                 | 9          | 49,6     | 9,00     |
| Q8WZJ8     | DNA-directed RNA polymerase III subunit rpc31 OS=Schizosaccharomyces pombe (strain 972 / ATCC 24843) GN=rpc31 PE=1 SV=1 - [RPC7_SCHPO]         | 228,89  | 42,38    | 1          | 9                 | 9          | 24,3     | 4,60     |
| O74857     | DNA-directed RNA polymerase III subunit rpc4 OS=Schizosaccharomyces pombe (strain 972 / ATCC 24843) GN=rpc53 PE=2 SV=1 - [RPC4_SCHPO]          | 218,55  | 44,85    | 1          | 10                | 10         | 36,8     | 5,11     |
| Q10264     | DNA cross-link repair protein pso2/snm1 OS=Schizosaccharomyces pombe (strain 972 / ATCC 24843) GN=pso2 PE=3 SV=3 - [PSO2_SCHPO]                | 198,92  | 19,82    | 1          | 10                | 10         | 63,0     | 8,16     |
| O94438     | 40S ribosomal protein S1-B OS=Schizosaccharomyces pombe (strain 972 / ATCC 24843) GN=rps102 PE=1 SV=3 - [RS3A2_SCHPO]                          | 194,81  | 25,40    | 1          | 6                 | 6          | 28,5     | 10,14    |
| O13896     | DNA-directed RNA polymerase III subunit RPC10 OS=Schizosaccharomyces pombe (strain 972 / ATCC 24843) GN=rpc11 PE=3 SV=1 - [RPC10_SCHPO]        | 181,26  | 66,06    | 1          | 4                 | 4          | 12,8     | 5,06     |
| Q9C0Z9     | DNA-directed RNA polymerase III subunit rpc9 OS=Schizosaccharomyces pombe (strain 972 / ATCC 24843) GN=rpc17 PE=1 SV=1 - [RPC9_SCHPO]          | 159,16  | 51,16    | 1          | 6                 | 6          | 14,9     | 4,77     |
| O94553     | Probable DNA-directed RNA polymerase III subunit rpc6 OS=Schizosaccharomyces pombe (strain 972 / ATCC 24843) GN=rpc6 PE=2 SV=1 - [RPC6_SCHPO]  | 156,24  | 39,53    | 1          | 7                 | 7          | 33,9     | 7,97     |
| Q10284     | Heat shock protein sks2 OS=Schizosaccharomyces pombe (strain 972 / ATCC 24843) GN=sks2 PE=1 SV=2 - [HSP75_SCHPO]                               | 155,21  | 15,50    | 1          | 6                 | 6          | 67,2     | 6,09     |
| P78958     | Glyceraldehyde-3-phosphate dehydrogenase 1 OS=Schizosaccharomyces pombe (strain 972 / ATCC 24843) GN=tdh1 PE=1 SV=1 - [G3P1_SCHPO]             | 151,22  | 16,67    | 1          | 5                 | 5          | 35,8     | 6,70     |
| P09322     | Histone H4 OS=Schizosaccharomyces pombe (strain 972 / ATCC 24843) GN=h4 PE=1 SV=2 - [H4_SCHPO]                                                 | 149,88  | 30,10    | 1          | 4                 | 4          | 11,4     | 11,36    |
| P35551     | rRNA 2'-O-methyltransferase fibrillar OS=Schizosaccharomyces pombe (strain 972 / ATCC 24843) GN=fib1 PE=1 SV=1 - [FBRL_SCHPO]                  | 147,53  | 15,74    | 1          | 4                 | 4          | 32,0     | 10,17    |
| O94514     | Nucleolar protein 56 OS=Schizosaccharomyces pombe (strain 972 / ATCC 24843) GN=nop56 PE=3 SV=1 - [NOP56_SCHPO]                                 | 145,16  | 8,05     | 1          | 4                 | 4          | 55,4     | 8,90     |
| P09627     | Plasma membrane ATPase 1 OS=Schizosaccharomyces pombe (strain 972 / ATCC 24843) GN=pma1 PE=1 SV=1 - [PMA1_SCHPO]                               | 140,32  | 6,64     | 1          | 5                 | 5          | 99,8     | 5,19     |
| Q9P7S7     | Nucleolar protein 58 OS=Schizosaccharomyces pombe (strain 972 / ATCC 24843) GN=nop58 PE=1 SV=1 - [NOP58_SCHPO]                                 | 138,63  | 12,40    | 1          | 5                 | 5          | 55,7     | 9,06     |
| O13370     | ATP-dependent RNA helicase ded1 OS=Schizosaccharomyces pombe (strain 972 / ATCC 24843) GN=ded1 PE=1 SV=1 - [DED1_SCHPO]                        | 132,83  | 14,78    | 1          | 7                 | 7          | 69,7     | 8,50     |
| O60176     | Uncharacterized RNA-binding protein C23E6.01c OS=Schizosaccharomyces pombe (strain 972 / ATCC 24843) GN=SPBC23E6.01c PE=1 SV=2 - [YG41_SCHPO]  | 119,15  | 26,85    | 1          | 7                 | 7          | 51,7     | 5,15     |

|        |                                                                                                                                                                         |        |       |   |   |   |       |       |
|--------|-------------------------------------------------------------------------------------------------------------------------------------------------------------------------|--------|-------|---|---|---|-------|-------|
| P36595 | DNA-directed RNA polymerases I, II, and III subunit RPABC2 OS=Schizosaccharomyces pombe (strain 972 / ATCC 24843) GN=rp6 PE=1 SV=1 - [RPAB2_SCHPO]                      | 114,25 | 26,76 | 1 | 3 | 3 | 15,7  | 4,37  |
| O14049 | 40S ribosomal protein S8-A OS=Schizosaccharomyces pombe (strain 972 / ATCC 24843) GN=rps8a PE=3 SV=1 - [RS8A_SCHPO]                                                     | 106,35 | 15,50 | 2 | 3 | 3 | 22,6  | 10,93 |
| Q09177 | DNA-directed RNA polymerases I and III subunit RPAC2 OS=Schizosaccharomyces pombe (strain 972 / ATCC 24843) GN=rpc19 PE=2 SV=1 - [RPAC2_SCHPO]                          | 102,28 | 29,60 | 1 | 3 | 3 | 13,7  | 4,68  |
| O42867 | 60S ribosomal protein L23 OS=Schizosaccharomyces pombe (strain 972 / ATCC 24843) GN=rpl23a PE=3 SV=1 - [RL23_SCHPO]                                                     | 99,43  | 22,30 | 1 | 3 | 3 | 14,9  | 10,21 |
| O74895 | 60S ribosomal protein L15-A OS=Schizosaccharomyces pombe (strain 972 / ATCC 24843) GN=rpl15a PE=3 SV=1 - [RL15A_SCHPO]                                                  | 97,20  | 24,88 | 2 | 5 | 5 | 23,8  | 11,25 |
| P09988 | Histone H3.1/H3.2 OS=Schizosaccharomyces pombe (strain 972 / ATCC 24843) GN=hht1 PE=1 SV=2 - [H31_SCHPO]                                                                | 93,18  | 43,38 | 1 | 4 | 4 | 15,3  | 11,27 |
| Q9C0Z7 | 40S ribosomal protein S6-B OS=Schizosaccharomyces pombe (strain 972 / ATCC 24843) GN=rps6b PE=1 SV=1 - [RS6B_SCHPO]                                                     | 93,05  | 12,97 | 1 | 2 | 2 | 27,5  | 10,77 |
| P31209 | Polyadenylate-binding protein, cytoplasmic and nuclear OS=Schizosaccharomyces pombe (strain 972 / ATCC 24843) GN=pab1 PE=1 SV=2 - [PABP_SCHPO]                          | 91,89  | 4,59  | 1 | 3 | 3 | 71,5  | 5,38  |
| O74391 | 60S ribosomal protein L25-B OS=Schizosaccharomyces pombe (strain 972 / ATCC 24843) GN=rpl25b PE=3 SV=1 - [RL25B_SCHPO]                                                  | 90,78  | 18,44 | 2 | 2 | 2 | 15,8  | 10,48 |
| O94285 | DNA-directed RNA polymerase III subunit rpc8 OS=Schizosaccharomyces pombe (strain 972 / ATCC 24843) GN=rpc25 PE=1 SV=1 - [RPC8_SCHPO]                                   | 90,55  | 23,15 | 1 | 4 | 4 | 23,2  | 5,03  |
| O94754 | 40S ribosomal protein S18 OS=Schizosaccharomyces pombe (strain 972 / ATCC 24843) GN=rps18a PE=1 SV=1 - [RS18_SCHPO]                                                     | 89,76  | 28,95 | 1 | 4 | 4 | 17,4  | 10,49 |
| O59855 | Probable heat shock protein ssa2 OS=Schizosaccharomyces pombe (strain 972 / ATCC 24843) GN=ssa2 PE=1 SV=3 - [HSP72_SCHPO]                                               | 88,15  | 9,58  | 1 | 4 | 4 | 70,2  | 5,25  |
| O60128 | 40S ribosomal protein S3 OS=Schizosaccharomyces pombe (strain 972 / ATCC 24843) GN=rps3 PE=1 SV=1 - [RS3_SCHPO]                                                         | 87,92  | 16,87 | 1 | 3 | 3 | 27,5  | 9,20  |
| Q09191 | DNA-directed RNA polymerases I, II, and III subunit RPABC1 OS=Schizosaccharomyces pombe (strain 972 / ATCC 24843) GN=rp5 PE=1 SV=1 - [RPAB1_SCHPO]                      | 87,31  | 11,43 | 1 | 2 | 2 | 23,9  | 9,23  |
| Q10157 | 60S ribosomal protein L11 OS=Schizosaccharomyces pombe (strain 972 / ATCC 24843) GN=rpl11a PE=1 SV=1 - [RL11_SCHPO]                                                     | 85,71  | 13,79 | 1 | 2 | 2 | 19,9  | 10,07 |
| O74976 | Putative peroxisomal-coenzyme A synthetase OS=Schizosaccharomyces pombe (strain 972 / ATCC 24843) GN=SPCC1827.03c PE=1 SV=1 - [FAT2_SCHPO]                              | 84,00  | 9,38  | 1 | 4 | 4 | 56,2  | 9,29  |
| B5BP45 | Uncharacterized amino-acid permease C460.01c OS=Schizosaccharomyces pombe (strain 972 / ATCC 24843) GN=SPBC460.01c PE=3 SV=1 - [YP51_SCHPO]                             | 82,88  | 4,02  | 1 | 3 | 3 | 62,7  | 6,68  |
| P04909 | Histone H2A-alpha OS=Schizosaccharomyces pombe (strain 972 / ATCC 24843) GN=hta1 PE=1 SV=3 - [H2A1_SCHPO]                                                               | 81,24  | 34,09 | 1 | 5 | 5 | 13,9  | 10,64 |
| Q10208 | Pyruvate kinase OS=Schizosaccharomyces pombe (strain 972 / ATCC 24843) GN=pyk1 PE=1 SV=1 - [KPYK_SCHPO]                                                                 | 79,36  | 7,27  | 1 | 3 | 3 | 55,5  | 7,96  |
| P36584 | 60S ribosomal protein L3-B OS=Schizosaccharomyces pombe (strain 972 / ATCC 24843) GN=rpl3b PE=3 SV=2 - [RL3B_SCHPO]                                                     | 73,70  | 4,90  | 2 | 2 | 2 | 43,8  | 10,27 |
| O14388 | 60S ribosomal protein L27-A OS=Schizosaccharomyces pombe (strain 972 / ATCC 24843) GN=rpl27a PE=2 SV=2 - [RL27A_SCHPO]                                                  | 73,47  | 15,44 | 1 | 2 | 2 | 15,4  | 10,84 |
| P28189 | 40S ribosomal protein S13 OS=Schizosaccharomyces pombe (strain 972 / ATCC 24843) GN=rps13 PE=1 SV=2 - [RS13_SCHPO]                                                      | 69,32  | 23,84 | 1 | 4 | 4 | 16,9  | 10,37 |
| Q9P785 | LisH domain-containing protein C1711.05 OS=Schizosaccharomyces pombe (strain 972 / ATCC 24843) GN=SPBC1711.05 PE=4 SV=1 - [YNY5_SCHPO]                                  | 69,22  | 6,87  | 1 | 2 | 2 | 47,4  | 4,37  |
| P40370 | Enolase 1-1 OS=Schizosaccharomyces pombe (strain 972 / ATCC 24843) GN=eno101 PE=1 SV=2 - [ENO11_SCHPO]                                                                  | 65,82  | 11,16 | 1 | 3 | 3 | 47,4  | 6,67  |
| O42699 | 60S ribosomal protein L19-B OS=Schizosaccharomyces pombe (strain 972 / ATCC 24843) GN=rpl19b PE=2 SV=2 - [RL19B_SCHPO]                                                  | 63,18  | 19,69 | 2 | 3 | 3 | 22,7  | 11,40 |
| P40847 | Switch-activating protein 1 OS=Schizosaccharomyces pombe (strain 972 / ATCC 24843) GN=sap1 PE=1 SV=2 - [SAP1_SCHPO]                                                     | 58,97  | 6,30  | 1 | 2 | 2 | 29,1  | 7,88  |
| Q9USZ4 | DNA-directed RNA polymerase I subunit rpa34 OS=Schizosaccharomyces pombe (strain 972 / ATCC 24843) GN=rpa34 PE=1 SV=1 - [RPA34_SCHPO]                                   | 58,50  | 15,14 | 1 | 2 | 2 | 28,0  | 5,52  |
| Q92372 | Replication factor A protein 1 OS=Schizosaccharomyces pombe (strain 972 / ATCC 24843) GN=ssb1 PE=1 SV=1 - [RFA1_SCHPO]                                                  | 57,10  | 10,02 | 1 | 5 | 5 | 68,2  | 6,74  |
| P04913 | Histone H2B-alpha OS=Schizosaccharomyces pombe (strain 972 / ATCC 24843) GN=htb1 PE=1 SV=3 - [H2B1_SCHPO]                                                               | 55,99  | 15,08 | 1 | 2 | 2 | 13,8  | 10,07 |
| P10989 | Actin OS=Schizosaccharomyces pombe (strain 972 / ATCC 24843) GN=act1 PE=1 SV=1 - [ACT_SCHPO]                                                                            | 55,80  | 7,20  | 1 | 2 | 2 | 41,7  | 5,48  |
| O14469 | 40S ribosomal protein S22 OS=Schizosaccharomyces pombe (strain 972 / ATCC 24843) GN=rps22a PE=2 SV=1 - [RS22_SCHPO]                                                     | 52,29  | 14,62 | 1 | 2 | 2 | 14,8  | 10,27 |
| Q09188 | ADP,ATP carrier protein OS=Schizosaccharomyces pombe (strain 972 / ATCC 24843) GN=anc1 PE=2 SV=1 - [ADT_SCHPO]                                                          | 49,72  | 9,94  | 1 | 3 | 3 | 35,0  | 9,96  |
| O13672 | 60S ribosomal protein L8 OS=Schizosaccharomyces pombe (strain 972 / ATCC 24843) GN=rpl8 PE=1 SV=3 - [RL8_SCHPO]                                                         | 49,60  | 12,36 | 1 | 3 | 3 | 28,6  | 10,35 |
| O14086 | DNA-directed RNA polymerase I subunit rpa49 OS=Schizosaccharomyces pombe (strain 972 / ATCC 24843) GN=rpa49 PE=2 SV=1 - [RPA49_SCHPO]                                   | 48,75  | 5,88  | 1 | 2 | 2 | 48,0  | 9,58  |
| P36604 | 78 kDa glucose-regulated protein homolog OS=Schizosaccharomyces pombe (strain 972 / ATCC 24843) GN=bip1 PE=3 SV=2 - [GRP78_SCHPO]                                       | 48,37  | 3,47  | 1 | 2 | 2 | 73,2  | 4,96  |
| O94529 | FACT complex subunit pob3 OS=Schizosaccharomyces pombe (strain 972 / ATCC 24843) GN=pob3 PE=3 SV=1 - [POB3_SCHPO]                                                       | 42,47  | 3,91  | 1 | 2 | 2 | 57,4  | 4,53  |
| Q10475 | Eukaryotic translation initiation factor 4 gamma OS=Schizosaccharomyces pombe (strain 972 / ATCC 24843) GN=tif471 PE=1 SV=1 - [IF4G_SCHPO]                              | 41,46  | 4,56  | 1 | 3 | 3 | 153,9 | 9,23  |
| P78946 | 60S ribosomal protein L26 OS=Schizosaccharomyces pombe (strain 972 / ATCC 24843) GN=rpl26 PE=3 SV=1 - [RL26_SCHPO]                                                      | 40,17  | 11,90 | 1 | 2 | 2 | 14,3  | 11,17 |
| Q9UT19 | Probable 5-methyltetrahydropteroyltriglutamate--homocysteine methyltransferase OS=Schizosaccharomyces pombe (strain 972 / ATCC 24843) GN=met26 PE=1 SV=1 - [METE_SCHPO] | 33,30  | 2,62  | 1 | 2 | 2 | 85,3  | 6,38  |
| P41891 | Protein gar2 OS=Schizosaccharomyces pombe (strain 972 / ATCC 24843) GN=gar2 PE=1 SV=2 - [GAR2_SCHPO]                                                                    | 32,39  | 6,60  | 1 | 2 | 2 | 53,0  | 4,97  |
| P00332 | Alcohol dehydrogenase OS=Schizosaccharomyces pombe (strain 972 / ATCC 24843) GN=adh1 PE=1 SV=2 - [ADH_SCHPO]                                                            | 30,42  | 9,43  | 1 | 2 | 2 | 37,4  | 6,93  |

| DbI8-3flag |                                                                                                                    |        |          |            |                   |            |          |          |
|------------|--------------------------------------------------------------------------------------------------------------------|--------|----------|------------|-------------------|------------|----------|----------|
| Accession  | Description                                                                                                        | Score  | Coverage | # Proteins | # Unique Peptides | # Peptides | MW [kDa] | calc. pl |
| Q9US25     | Chromodomain helicase hrp1 OS=Schizosaccharomyces pombe (strain 972 / ATCC 24843) GN=hrp1 PE=1 SV=1 - [HRP1_SCHPO] | 640,16 | 36,64    | 1          | 32                | 32         | 158,5    | 5,83     |

|          |                                                                                                                                                                         |        |       |   |    |    |       |       |
|----------|-------------------------------------------------------------------------------------------------------------------------------------------------------------------------|--------|-------|---|----|----|-------|-------|
| O94387   | Uncharacterized ATP-dependent helicase C29A10.10c OS=Schizosaccharomyces pombe (strain 972 / ATCC 24843) GN=SPBC29A10.10c PE=3 SV=1 - [YGSA_SCHPO]                      | 551,74 | 16,00 | 1 | 25 | 25 | 222,1 | 8,41  |
| P40370   | Enolase 1-1 OS=Schizosaccharomyces pombe (strain 972 / ATCC 24843) GN=eno101 PE=1 SV=2 - [ENO11_SCHPO]                                                                  | 329,57 | 39,41 | 1 | 11 | 11 | 47,4  | 6,67  |
| P09322   | Histone H4 OS=Schizosaccharomyces pombe (strain 972 / ATCC 24843) GN=hhf1 PE=1 SV=2 - [H4_SCHPO]                                                                        | 325,47 | 41,75 | 1 | 5  | 5  | 11,4  | 11,36 |
| P78958   | Glyceraldehyde-3-phosphate dehydrogenase 1 OS=Schizosaccharomyces pombe (strain 972 / ATCC 24843) GN=idh1 PE=1 SV=1 - [G3P1_SCHPO]                                      | 278,53 | 27,38 | 1 | 10 | 10 | 35,8  | 6,70  |
| P09627   | Plasma membrane ATPase 1 OS=Schizosaccharomyces pombe (strain 972 / ATCC 24843) GN=pma1 PE=1 SV=1 - [PMA1_SCHPO]                                                        | 267,36 | 10,23 | 1 | 7  | 7  | 99,8  | 5,19  |
| O59855   | Probable heat shock protein ssa2 OS=Schizosaccharomyces pombe (strain 972 / ATCC 24843) GN=ssa2 PE=1 SV=3 - [HSP72_SCHPO]                                               | 239,93 | 20,09 | 1 | 10 | 10 | 70,2  | 5,25  |
| O60101   | Phosphoglycerate kinase OS=Schizosaccharomyces pombe (strain 972 / ATCC 24843) GN=pgk1 PE=1 SV=1 - [PGK_SCHPO]                                                          | 234,20 | 35,02 | 1 | 10 | 10 | 43,9  | 8,15  |
| Q92345   | Probable pyruvate decarboxylase C1F8.07c OS=Schizosaccharomyces pombe (strain 972 / ATCC 24843) GN=SPAC1F8.07c PE=1 SV=3 - [PDC2_SCHPO]                                 | 231,42 | 19,16 | 1 | 9  | 9  | 61,7  | 5,64  |
| P50522   | Elongation factor 1-alpha-A OS=Schizosaccharomyces pombe (strain 972 / ATCC 24843) GN=tef1a PE=1 SV=2 - [EF1A1_SCHPO]                                                   | 214,21 | 15,43 | 2 | 8  | 8  | 49,6  | 9,00  |
| P36580   | Fructose-bisphosphate aldolase OS=Schizosaccharomyces pombe (strain 972 / ATCC 24843) GN=fba1 PE=1 SV=2 - [ALF_SCHPO]                                                   | 202,03 | 36,03 | 1 | 7  | 7  | 39,5  | 6,35  |
| Q9P7L5   | Ornithine aminotransferase car2 OS=Schizosaccharomyces pombe (strain 972 / ATCC 24843) GN=car2 PE=2 SV=1 - [OAT_SCHPO]                                                  | 193,51 | 9,59  | 1 | 3  | 3  | 48,2  | 6,34  |
| Q10208   | Pyruvate kinase OS=Schizosaccharomyces pombe (strain 972 / ATCC 24843) GN=pyk1 PE=1 SV=1 - [KPYK_SCHPO]                                                                 | 180,45 | 27,90 | 1 | 9  | 9  | 55,5  | 7,96  |
| Q9UT19   | Probable 5-methyltetrahydropteroyltriglutamate--homocysteine methyltransferase OS=Schizosaccharomyces pombe (strain 972 / ATCC 24843) GN=met26 PE=1 SV=1 - [METE_SCHPO] | 173,80 | 12,83 | 1 | 9  | 9  | 85,3  | 6,38  |
| O74391   | 60S ribosomal protein L25-B OS=Schizosaccharomyces pombe (strain 972 / ATCC 24843) GN=rpl25b PE=3 SV=1 - [RL25B_SCHPO]                                                  | 172,17 | 18,44 | 2 | 2  | 2  | 15,8  | 10,48 |
| O14460   | Elongation factor 2 OS=Schizosaccharomyces pombe (strain 972 / ATCC 24843) GN=eff201 PE=1 SV=2 - [EF2_SCHPO]                                                            | 158,38 | 10,45 | 1 | 6  | 6  | 93,2  | 6,43  |
| O60128   | 40S ribosomal protein S3 OS=Schizosaccharomyces pombe (strain 972 / ATCC 24843) GN=rps3 PE=1 SV=1 - [RS3_SCHPO]                                                         | 140,92 | 17,67 | 1 | 4  | 4  | 27,5  | 9,20  |
| O59838   | Heat shock protein homolog pss1 OS=Schizosaccharomyces pombe (strain 972 / ATCC 24843) GN=pss1 PE=1 SV=2 - [HSP7F_SCHPO]                                                | 140,91 | 7,50  | 1 | 4  | 4  | 80,3  | 5,07  |
| P40847   | Switch-activating protein 1 OS=Schizosaccharomyces pombe (strain 972 / ATCC 24843) GN=sap1 PE=1 SV=2 - [SAP1_SCHPO]                                                     | 130,47 | 20,47 | 1 | 4  | 4  | 29,1  | 7,88  |
| P22774-2 | Isoform Short of Heat shock 70 kDa protein, mitochondrial OS=Schizosaccharomyces pombe (strain 972 / ATCC 24843) GN=ssp1 - [HSP7M_SCHPO]                                | 126,55 | 11,39 | 2 | 5  | 5  | 69,4  | 5,97  |
| Q10284   | Heat shock protein sks2 OS=Schizosaccharomyces pombe (strain 972 / ATCC 24843) GN=sks2 PE=1 SV=2 - [HSP75_SCHPO]                                                        | 122,21 | 8,81  | 1 | 4  | 4  | 67,2  | 6,09  |
| Q9US24   | DNA-directed RNA polymerase I subunit rpa34 OS=Schizosaccharomyces pombe (strain 972 / ATCC 24843) GN=rpa34 PE=1 SV=1 - [RPA34_SCHPO]                                   | 121,87 | 35,86 | 1 | 6  | 6  | 28,0  | 5,52  |
| P00332   | Alcohol dehydrogenase OS=Schizosaccharomyces pombe (strain 972 / ATCC 24843) GN=adh1 PE=1 SV=2 - [ADH_SCHPO]                                                            | 121,82 | 21,71 | 1 | 6  | 6  | 37,4  | 6,93  |
| P15398   | DNA-directed RNA polymerase I subunit rpa1 OS=Schizosaccharomyces pombe (strain 972 / ATCC 24843) GN=rpa1 PE=1 SV=2 - [RPA1_SCHPO]                                      | 119,91 | 5,51  | 1 | 8  | 8  | 189,1 | 6,64  |
| O60176   | Uncharacterized RNA-binding protein C23E6.01c OS=Schizosaccharomyces pombe (strain 972 / ATCC 24843) GN=SPBC23E6.01c PE=1 SV=2 - [YG41_SCHPO]                           | 117,05 | 18,82 | 1 | 5  | 5  | 51,7  | 5,15  |
| O14027   | Probable pyridoxine biosynthesis PDX1-like protein OS=Schizosaccharomyces pombe (strain 972 / ATCC 24843) GN=snz1 PE=1 SV=1 - [PDX1_SCHPO]                              | 115,48 | 8,11  | 1 | 2  | 2  | 31,4  | 6,27  |
| O14049   | 40S ribosomal protein S8-A OS=Schizosaccharomyces pombe (strain 972 / ATCC 24843) GN=rps8a PE=3 SV=1 - [RS8A_SCHPO]                                                     | 113,05 | 15,50 | 2 | 2  | 2  | 22,6  | 10,93 |
| Q9US22   | 60S ribosomal protein L15-B OS=Schizosaccharomyces pombe (strain 972 / ATCC 24843) GN=rpl15b PE=1 SV=1 - [RL15B_SCHPO]                                                  | 109,54 | 17,91 | 1 | 3  | 3  | 23,8  | 11,18 |
| O74766   | Probable delta-1-pyrroline-5-carboxylate dehydrogenase OS=Schizosaccharomyces pombe (strain 972 / ATCC 24843) GN=SPBC24C6.04 PE=1 SV=1 - [PUT2_SCHPO]                   | 107,87 | 7,85  | 1 | 3  | 3  | 60,2  | 7,33  |
| O42700   | Transaldolase OS=Schizosaccharomyces pombe (strain 972 / ATCC 24843) GN=tal1 PE=1 SV=2 - [TAL1_SCHPO]                                                                   | 107,23 | 9,94  | 1 | 3  | 3  | 35,2  | 5,86  |
| P31209   | Polyadenylate-binding protein, cytoplasmic and nuclear OS=Schizosaccharomyces pombe (strain 972 / ATCC 24843) GN=pab1 PE=1 SV=2 - [PABP_SCHPO]                          | 105,83 | 7,04  | 1 | 4  | 4  | 71,5  | 5,38  |
| P41887   | Heat shock protein 90 homolog OS=Schizosaccharomyces pombe (strain 972 / ATCC 24843) GN=swo1 PE=1 SV=2 - [HSP90_SCHPO]                                                  | 102,78 | 7,39  | 1 | 4  | 4  | 80,5  | 4,96  |
| P78827   | Probable ketol-acid reductoisomerase, mitochondrial OS=Schizosaccharomyces pombe (strain 972 / ATCC 24843) GN=ilv5 PE=1 SV=2 - [ILV5_SCHPO]                             | 102,71 | 9,16  | 1 | 3  | 3  | 45,2  | 9,45  |
| P78854   | Lysophospholipase 1 OS=Schizosaccharomyces pombe (strain 972 / ATCC 24843) GN=plb1 PE=2 SV=2 - [PLB1_SCHPO]                                                             | 102,40 | 4,57  | 1 | 2  | 2  | 67,1  | 4,92  |
| O13639   | Adenosylhomocysteinase OS=Schizosaccharomyces pombe (strain 972 / ATCC 24843) GN=pi047 PE=3 SV=1 - [SAHH_SCHPO]                                                         | 102,38 | 11,78 | 1 | 4  | 4  | 47,4  | 5,94  |
| O13370   | ATP-dependent RNA helicase ded1 OS=Schizosaccharomyces pombe (strain 972 / ATCC 24843) GN=ded1 PE=1 SV=1 - [DED1_SCHPO]                                                 | 100,01 | 7,23  | 1 | 4  | 4  | 69,7  | 8,50  |
| O74779   | Microtubule-associated protein mug164 OS=Schizosaccharomyces pombe (strain 972 / ATCC 24843) GN=mug164 PE=1 SV=4 - [MU164_SCHPO]                                        | 98,92  | 10,06 | 1 | 3  | 3  | 55,4  | 11,81 |
| O94514   | Nucleolar protein 56 OS=Schizosaccharomyces pombe (strain 972 / ATCC 24843) GN=nop56 PE=3 SV=1 - [NOP56_SCHPO]                                                          | 96,05  | 4,43  | 1 | 3  | 3  | 55,4  | 8,90  |
| P05752   | 40S ribosomal protein S6-A OS=Schizosaccharomyces pombe (strain 972 / ATCC 24843) GN=rps6a PE=1 SV=2 - [RS6A_SCHPO]                                                     | 95,15  | 17,15 | 1 | 3  | 3  | 27,5  | 10,83 |
| O42938   | 6-phosphofructokinase OS=Schizosaccharomyces pombe (strain 972 / ATCC 24843) GN=pfk1 PE=1 SV=1 - [K6PF_SCHPO]                                                           | 94,45  | 6,58  | 1 | 5  | 5  | 102,5 | 6,19  |
| P87167   | Uba3-binding protein but2 OS=Schizosaccharomyces pombe (strain 972 / ATCC 24843) GN=but2 PE=1 SV=1 - [BUT2_SCHPO]                                                       | 94,13  | 7,69  | 1 | 2  | 2  | 43,6  | 9,00  |
| O74836   | 60S ribosomal protein L1-B OS=Schizosaccharomyces pombe (strain 972 / ATCC 24843) GN=rpl1b PE=1 SV=1 - [RL1B_SCHPO]                                                     | 93,87  | 19,91 | 1 | 3  | 3  | 23,9  | 9,82  |
| Q9UT09   | Phospho-2-dehydro-3-deoxyheptonate aldolase, tyrosine-inhibited OS=Schizosaccharomyces pombe (strain 972 / ATCC 24843) GN=aro4 PE=3 SV=1 - [AROG_SCHPO]                 | 93,02  | 9,95  | 1 | 2  | 3  | 40,6  | 7,23  |
| P36623   | Phosphoglycerate mutase OS=Schizosaccharomyces pombe (strain 972 / ATCC 24843) GN=gpm1 PE=1 SV=1 - [PMGY_SCHPO]                                                         | 91,55  | 25,59 | 1 | 5  | 5  | 23,8  | 7,47  |
| O42699   | 60S ribosomal protein L19-B OS=Schizosaccharomyces pombe (strain 972 / ATCC 24843) GN=rpl19b PE=2 SV=2 - [RL19B_SCHPO]                                                  | 90,03  | 19,69 | 2 | 3  | 3  | 22,7  | 11,40 |
| Q10192   | 60S ribosomal protein L18-A OS=Schizosaccharomyces pombe (strain 972 / ATCC 24843) GN=rpl18a PE=1 SV=1 - [RL18A_SCHPO]                                                  | 89,39  | 14,44 | 1 | 2  | 2  | 21,2  | 11,66 |
| O74835   | rRNA biogenesis protein rrp5 OS=Schizosaccharomyces pombe (strain 972 / ATCC 24843) GN=rrp5 PE=1 SV=1 - [RRP5_SCHPO]                                                    | 88,22  | 2,78  | 1 | 4  | 4  | 187,4 | 5,49  |
| O74173   | Elongation factor 1-beta OS=Schizosaccharomyces pombe (strain 972 / ATCC 24843) GN=tef5 PE=2 SV=1 - [EF1B_SCHPO]                                                        | 87,09  | 12,62 | 1 | 2  | 2  | 23,5  | 4,50  |
| P08096   | DNA topoisomerase 2 OS=Schizosaccharomyces pombe (strain 972 / ATCC 24843) GN=top2 PE=1 SV=2 - [TOP2_SCHPO]                                                             | 87,05  | 3,23  | 1 | 4  | 4  | 167,8 | 7,28  |

|        |                                                                                                                                                                 |       |       |   |   |   |       |       |
|--------|-----------------------------------------------------------------------------------------------------------------------------------------------------------------|-------|-------|---|---|---|-------|-------|
| P36584 | 60S ribosomal protein L3-B OS=Schizosaccharomyces pombe (strain 972 / ATCC 24843)<br>GN=rpl3b PE=3 SV=2 - [RL3B_SCHPO]                                          | 85,87 | 6,44  | 2 | 2 | 2 | 43,8  | 10,27 |
| Q9P7S7 | Nucleolar protein 58 OS=Schizosaccharomyces pombe (strain 972 / ATCC 24843) GN=nop58<br>PE=1 SV=1 - [NOP58_SCHPO]                                               | 84,97 | 6,89  | 1 | 3 | 3 | 55,7  | 9,06  |
| O13972 | Probable serine hydroxymethyltransferase, cytosolic OS=Schizosaccharomyces pombe (strain 972 / ATCC 24843) GN=SPAC24C9.12c PE=3 SV=1 - [GLYD_SCHPO]             | 84,19 | 7,71  | 1 | 3 | 3 | 51,8  | 7,81  |
| P07669 | Triosephosphate isomerase OS=Schizosaccharomyces pombe (strain 972 / ATCC 24843)<br>GN=tpi1 PE=1 SV=4 - [TPIS_SCHPO]                                            | 84,09 | 17,67 | 1 | 4 | 4 | 27,2  | 7,03  |
| O94754 | 40S ribosomal protein S18 OS=Schizosaccharomyces pombe (strain 972 / ATCC 24843)<br>GN=rps18a PE=1 SV=1 - [RS18_SCHPO]                                          | 83,96 | 25,66 | 1 | 4 | 4 | 17,4  | 10,49 |
| Q09781 | 40S ribosomal protein S1-A OS=Schizosaccharomyces pombe (strain 972 / ATCC 24843)<br>GN=rps101 PE=3 SV=2 - [RS3A1_SCHPO]                                        | 82,15 | 22,22 | 1 | 2 | 5 | 28,5  | 9,99  |
| O94438 | 40S ribosomal protein S1-B OS=Schizosaccharomyces pombe (strain 972 / ATCC 24843)<br>GN=rps102 PE=1 SV=3 - [RS3A2_SCHPO]                                        | 79,88 | 25,00 | 1 | 3 | 6 | 28,5  | 10,14 |
| Q09755 | Putative phospho-2-dehydro-3-deoxyheptonate aldolase OS=Schizosaccharomyces pombe<br>(strain 972 / ATCC 24843) GN=SPAC24H6.10c PE=3 SV=1 - [AROF_SCHPO]         | 78,31 | 10,33 | 1 | 2 | 3 | 39,7  | 6,80  |
| P42656 | DNA damage checkpoint protein rad24 OS=Schizosaccharomyces pombe (strain 972 / ATCC 24843)<br>GN=rad24 PE=1 SV=2 - [RAD24_SCHPO]                                | 78,02 | 8,89  | 1 | 2 | 2 | 30,1  | 4,72  |
| Q10289 | Fatty acid synthase subunit alpha OS=Schizosaccharomyces pombe (strain 972 / ATCC 24843)<br>GN=fas2 PE=1 SV=2 - [FAS2_SCHPO]                                    | 77,95 | 1,19  | 1 | 2 | 2 | 202,0 | 6,18  |
| Q9P3T6 | 40S ribosomal protein S5-B OS=Schizosaccharomyces pombe (strain 972 / ATCC 24843)<br>GN=rps5b PE=3 SV=1 - [RS5B_SCHPO]                                          | 77,71 | 22,66 | 1 | 3 | 3 | 22,3  | 9,85  |
| O94703 | DNA-directed RNA polymerase I subunit RPA12 OS=Schizosaccharomyces pombe (strain 972 / ATCC 24843)<br>GN=rpa12 PE=3 SV=1 - [RPA12_SCHPO]                        | 77,00 | 27,73 | 1 | 2 | 2 | 13,1  | 5,15  |
| P35551 | rRNA 2'-O-methyltransferase fibrillarin OS=Schizosaccharomyces pombe (strain 972 / ATCC 24843)<br>GN=fib1 PE=1 SV=1 - [FBRL_SCHPO]                              | 75,96 | 10,16 | 1 | 3 | 3 | 32,0  | 10,17 |
| P22068 | ATP synthase subunit beta, mitochondrial OS=Schizosaccharomyces pombe (strain 972 / ATCC 24843)<br>GN=atp2 PE=1 SV=1 - [ATPB_SCHPO]                             | 75,47 | 14,10 | 1 | 5 | 5 | 56,8  | 5,99  |
| Q10157 | 60S ribosomal protein L11 OS=Schizosaccharomyces pombe (strain 972 / ATCC 24843)<br>GN=rpl11a PE=1 SV=1 - [RL11_SCHPO]                                          | 74,56 | 13,79 | 1 | 2 | 2 | 19,9  | 10,07 |
| O94658 | 60S ribosomal protein L36-B OS=Schizosaccharomyces pombe (strain 972 / ATCC 24843)<br>GN=rpl36b PE=3 SV=1 - [RL36B_SCHPO]                                       | 70,08 | 20,20 | 2 | 2 | 2 | 11,3  | 11,84 |
| O94238 | 60S ribosomal protein L14 OS=Schizosaccharomyces pombe (strain 972 / ATCC 24843)<br>GN=rpl14 PE=2 SV=1 - [RL14_SCHPO]                                           | 67,82 | 19,40 | 1 | 3 | 3 | 15,2  | 10,35 |
| O74175 | 60S ribosomal protein L13 OS=Schizosaccharomyces pombe (strain 972 / ATCC 24843)<br>GN=rpl13 PE=1 SV=1 - [RL13_SCHPO]                                           | 67,70 | 27,88 | 1 | 3 | 3 | 23,5  | 10,70 |
| O42867 | 60S ribosomal protein L23 OS=Schizosaccharomyces pombe (strain 972 / ATCC 24843)<br>GN=rpl23a PE=3 SV=1 - [RL23_SCHPO]                                          | 67,08 | 39,57 | 1 | 4 | 4 | 14,9  | 10,21 |
| Q09668 | 60S ribosomal protein L22 OS=Schizosaccharomyces pombe (strain 972 / ATCC 24843)<br>GN=rpl22 PE=1 SV=3 - [RL22_SCHPO]                                           | 66,40 | 17,95 | 1 | 2 | 2 | 13,3  | 9,64  |
| O13672 | 60S ribosomal protein L8 OS=Schizosaccharomyces pombe (strain 972 / ATCC 24843) GN=rpl8<br>PE=1 SV=3 - [RL8_SCHPO]                                              | 65,38 | 9,65  | 1 | 2 | 2 | 28,6  | 10,35 |
| Q42598 | Threonine synthase OS=Schizosaccharomyces pombe (strain 972 / ATCC 24843) GN=thrc<br>PE=1 SV=1 - [THRC_SCHPO]                                                   | 63,87 | 5,64  | 1 | 2 | 2 | 57,6  | 5,59  |
| P41891 | Protein gar2 OS=Schizosaccharomyces pombe (strain 972 / ATCC 24843) GN=gar2 PE=1 SV=2<br>- [GAR2_SCHPO]                                                         | 63,74 | 10,20 | 1 | 3 | 3 | 53,0  | 4,97  |
| O94489 | Elongation factor 3 OS=Schizosaccharomyces pombe (strain 972 / ATCC 24843) GN=tef3 PE=1<br>SV=1 - [EF3_SCHPO]                                                   | 63,33 | 6,69  | 1 | 5 | 5 | 115,7 | 6,49  |
| O94700 | Multiprotein-bridging factor 1 OS=Schizosaccharomyces pombe (strain 972 / ATCC 24843)<br>GN=mbf1 PE=3 SV=1 - [MBF1_SCHPO]                                       | 63,20 | 23,65 | 1 | 3 | 3 | 16,0  | 10,49 |
| Q9P784 | 60S ribosomal protein L4-B OS=Schizosaccharomyces pombe (strain 972 / ATCC 24843)<br>GN=rpl4b PE=3 SV=1 - [RL4B_SCHPO]                                          | 62,92 | 10,74 | 1 | 3 | 3 | 39,9  | 10,71 |
| O14351 | Uncharacterized oxidoreductase C30D10.05c OS=Schizosaccharomyces pombe (strain 972 / ATCC 24843)<br>GN=SPBC30D10.05c PE=3 SV=1 - [YB45_SCHPO]                   | 62,86 | 9,72  | 1 | 2 | 2 | 26,6  | 8,35  |
| P05733 | 60S ribosomal protein L37-B OS=Schizosaccharomyces pombe (strain 972 / ATCC 24843)<br>GN=rpl37b PE=1 SV=4 - [RL37B_SCHPO]                                       | 62,48 | 26,37 | 1 | 2 | 2 | 10,1  | 11,46 |
| O42914 | Uncharacterized protein C16A3.08c OS=Schizosaccharomyces pombe (strain 972 / ATCC 24843)<br>GN=SPBC16A3.08c PE=1 SV=1 - [YB18_SCHPO]                            | 60,56 | 16,20 | 1 | 3 | 3 | 30,9  | 10,14 |
| Q09757 | 40S ribosomal protein S9-A OS=Schizosaccharomyces pombe (strain 972 / ATCC 24843)<br>GN=rps9a PE=1 SV=2 - [RS9A_SCHPO]                                          | 59,63 | 13,61 | 2 | 3 | 3 | 22,1  | 10,37 |
| Q09864 | Heat shock protein 60, mitochondrial OS=Schizosaccharomyces pombe (strain 972 / ATCC 24843)<br>GN=hsp60 PE=1 SV=1 - [HSP60_SCHPO]                               | 59,20 | 4,12  | 1 | 2 | 2 | 62,1  | 5,99  |
| O42945 | Probable pre-mRNA-splicing factor ATP-dependent RNA helicase prp43<br>OS=Schizosaccharomyces pombe (strain 972 / ATCC 24843) GN=prp43 PE=3 SV=1 - [DHX15_SCHPO] | 57,56 | 2,86  | 1 | 2 | 2 | 83,8  | 6,32  |
| P04910 | Histone H2A-beta OS=Schizosaccharomyces pombe (strain 972 / ATCC 24843) GN=hta2 PE=1<br>SV=2 - [H2A2_SCHPO]                                                     | 54,52 | 29,77 | 2 | 3 | 3 | 13,8  | 10,52 |
| O60198 | S-adenosylmethionine synthase OS=Schizosaccharomyces pombe (strain 972 / ATCC 24843)<br>GN=sam1 PE=3 SV=1 - [METK_SCHPO]                                        | 52,88 | 4,97  | 1 | 2 | 2 | 41,8  | 6,04  |
| P79071 | 60S ribosomal protein L6 OS=Schizosaccharomyces pombe (strain 972 / ATCC 24843) GN=rpl6<br>PE=1 SV=2 - [RL6_SCHPO]                                              | 50,32 | 23,08 | 1 | 4 | 4 | 21,2  | 10,26 |
| Q92372 | Replication factor A protein 1 OS=Schizosaccharomyces pombe (strain 972 / ATCC 24843)<br>GN=ssb1 PE=1 SV=1 - [RFA1_SCHPO]                                       | 48,98 | 6,08  | 1 | 3 | 3 | 68,2  | 6,74  |
| O13907 | Probable ATP-citrate synthase subunit 2 OS=Schizosaccharomyces pombe (strain 972 / ATCC 24843)<br>GN=SPAC22A12.16 PE=1 SV=1 - [ACL2_SCHPO]                      | 48,75 | 4,27  | 1 | 2 | 2 | 53,9  | 6,09  |
| O74892 | 40S ribosomal protein S2 OS=Schizosaccharomyces pombe (strain 972 / ATCC 24843)<br>GN=rps2 PE=1 SV=1 - [RS2_SCHPO]                                              | 48,09 | 9,49  | 1 | 2 | 2 | 27,6  | 10,08 |
| O94267 | FACT complex subunit spt16 OS=Schizosaccharomyces pombe (strain 972 / ATCC 24843)<br>GN=spt16 PE=1 SV=1 - [SPT16_SCHPO]                                         | 48,01 | 2,16  | 1 | 2 | 2 | 116,4 | 5,26  |
| O94692 | RuvB-like helicase 2 OS=Schizosaccharomyces pombe (strain 972 / ATCC 24843) GN=rvb2<br>PE=1 SV=1 - [RUVB2_SCHPO]                                                | 47,33 | 4,73  | 1 | 2 | 2 | 51,5  | 5,39  |
| O42848 | 60S ribosomal protein L16-A OS=Schizosaccharomyces pombe (strain 972 / ATCC 24843)<br>GN=rpl16a PE=1 SV=1 - [RL16A_SCHPO]                                       | 47,04 | 7,61  | 1 | 2 | 2 | 22,0  | 10,55 |
| P40375 | NAD-dependent malic enzyme OS=Schizosaccharomyces pombe (strain 972 / ATCC 24843)<br>GN=mae2 PE=1 SV=1 - [MAOX_SCHPO]                                           | 44,80 | 2,83  | 1 | 2 | 2 | 62,5  | 6,01  |
| O14370 | Branched-chain-amino-acid aminotransferase, mitochondrial OS=Schizosaccharomyces pombe<br>(strain 972 / ATCC 24843) GN=eca39 PE=1 SV=3 - [BCA1_SCHPO]           | 44,30 | 4,92  | 1 | 2 | 2 | 47,8  | 8,70  |
| P58234 | 40S ribosomal protein S19-A OS=Schizosaccharomyces pombe (strain 972 / ATCC 24843)<br>GN=rps19a PE=2 SV=1 - [RS19A_SCHPO]                                       | 43,91 | 14,58 | 1 | 2 | 2 | 16,1  | 9,70  |
| P05732 | 60S ribosomal protein L20 OS=Schizosaccharomyces pombe (strain 972 / ATCC 24843)<br>GN=rpl20a PE=1 SV=3 - [RL20_SCHPO]                                          | 43,36 | 25,00 | 1 | 3 | 3 | 20,6  | 10,42 |
| P47943 | ATP-dependent RNA helicase elf4A OS=Schizosaccharomyces pombe (strain 972 / ATCC 24843)<br>GN=elf4 PE=1 SV=2 - [IF4A_SCHPO]                                     | 42,93 | 5,36  | 1 | 2 | 2 | 44,4  | 5,02  |
| O14007 | H/ACA ribonucleoprotein complex subunit 4 OS=Schizosaccharomyces pombe (strain 972 / ATCC 24843)<br>GN=cbf5 PE=3 SV=1 - [CBF5_SCHPO]                            | 41,76 | 4,22  | 1 | 2 | 2 | 53,1  | 8,97  |
| O60144 | 40S ribosomal protein S16 OS=Schizosaccharomyces pombe (strain 972 / ATCC 24843)<br>GN=rps16a PE=2 SV=1 - [RS16_SCHPO]                                          | 41,11 | 22,86 | 1 | 3 | 3 | 15,4  | 10,13 |

|        |                                                                                                                                                 |       |       |   |   |   |       |       |
|--------|-------------------------------------------------------------------------------------------------------------------------------------------------|-------|-------|---|---|---|-------|-------|
| O59804 | 10 kDa heat shock protein, mitochondrial OS=Schizosaccharomyces pombe (strain 972 / ATCC 24843) GN=hsp10 PE=1 SV=1 - [CH10_SCHPO]               | 40,32 | 22,12 | 1 | 2 | 2 | 11,3  | 9,36  |
| P87142 | Heat shock protein 70 homolog C57A7.12 OS=Schizosaccharomyces pombe (strain 972 / ATCC 24843) GN=SPAC57A7.12 PE=1 SV=3 - [YDMC_SCHPO]           | 40,06 | 3,71  | 1 | 2 | 2 | 61,2  | 4,89  |
| Q9URM2 | Probable transketolase OS=Schizosaccharomyces pombe (strain 972 / ATCC 24843) GN=SPBC2G5.05 PE=2 SV=1 - [TKT_SCHPO]                             | 37,91 | 4,09  | 1 | 2 | 2 | 75,1  | 6,80  |
| P36592 | DNA repair and recombination protein rad22 OS=Schizosaccharomyces pombe (strain 972 / ATCC 24843) GN=rad22 PE=1 SV=2 - [RAD22_SCHPO]            | 36,72 | 9,17  | 1 | 2 | 2 | 51,9  | 8,40  |
| O42952 | 40S ribosomal protein S30 OS=Schizosaccharomyces pombe (strain 972 / ATCC 24843) GN=rps30a PE=3 SV=2 - [RS30_SCHPO]                             | 34,77 | 19,67 | 1 | 2 | 2 | 6,9   | 11,68 |
| O75000 | 60S ribosomal protein L12 OS=Schizosaccharomyces pombe (strain 972 / ATCC 24843) GN=rpl1201 PE=1 SV=1 - [RL12_SCHPO]                            | 34,18 | 20,61 | 1 | 2 | 2 | 17,7  | 9,31  |
| P56289 | Eukaryotic translation initiation factor 5A-1 OS=Schizosaccharomyces pombe (strain 972 / ATCC 24843) GN=tif51a PE=1 SV=1 - [IF5A1_SCHPO]        | 33,96 | 19,11 | 2 | 2 | 2 | 17,1  | 4,89  |
| O14086 | DNA-directed RNA polymerase I subunit rpa49 OS=Schizosaccharomyces pombe (strain 972 / ATCC 24843) GN=rpa49 PE=2 SV=1 - [RPA49_SCHPO]           | 33,05 | 5,18  | 1 | 2 | 2 | 48,0  | 9,58  |
| O14344 | Inosine-5'-monophosphate dehydrogenase OS=Schizosaccharomyces pombe (strain 972 / ATCC 24843) GN=qua1 PE=2 SV=1 - [IMDH_SCHPO]                  | 32,60 | 4,20  | 1 | 2 | 2 | 57,0  | 6,87  |
| Q9USU7 | HMG box-containing protein C28F2.11 OS=Schizosaccharomyces pombe (strain 972 / ATCC 24843) GN=SPBC28F2.11 PE=1 SV=1 - [YHHB_SCHPO]              | 32,52 | 14,19 | 1 | 3 | 3 | 33,9  | 9,32  |
| P09988 | Histone H3.1/H3.2 OS=Schizosaccharomyces pombe (strain 972 / ATCC 24843) GN=hht1 PE=1 SV=2 - [H31_SCHPO]                                        | 31,92 | 30,15 | 1 | 2 | 2 | 15,3  | 11,27 |
| P78812 | 6-phosphogluconate dehydrogenase, decarboxylating OS=Schizosaccharomyces pombe (strain 972 / ATCC 24843) GN=SPBC660.16 PE=1 SV=2 - [6PGD_SCHPO] | 31,25 | 11,18 | 1 | 4 | 4 | 53,6  | 7,14  |
| P78811 | Probable UTP-glucose-1-phosphate uridylyltransferase OS=Schizosaccharomyces pombe (strain 972 / ATCC 24843) GN=fuy1 PE=1 SV=2 - [UGPA1_SCHPO]   | 30,66 | 4,55  | 1 | 2 | 2 | 56,4  | 7,52  |
| O14069 | Probable 60S ribosomal protein L28e OS=Schizosaccharomyces pombe (strain 972 / ATCC 24843) GN=rpl28e PE=1 SV=1 - [RL28E_SCHPO]                  | 30,58 | 35,82 | 1 | 4 | 4 | 14,7  | 11,22 |
| P78946 | 60S ribosomal protein L26 OS=Schizosaccharomyces pombe (strain 972 / ATCC 24843) GN=rpl26 PE=3 SV=1 - [RL26_SCHPO]                              | 30,34 | 16,67 | 1 | 2 | 2 | 14,3  | 11,17 |
| P10989 | Actin OS=Schizosaccharomyces pombe (strain 972 / ATCC 24843) GN=act1 PE=1 SV=1 - [ACT_SCHPO]                                                    | 29,00 | 13,33 | 1 | 3 | 3 | 41,7  | 5,48  |
| P36604 | 78 kDa glucose-regulated protein homolog OS=Schizosaccharomyces pombe (strain 972 / ATCC 24843) GN=bjp1 PE=3 SV=2 - [GRP78_SCHPO]               | 28,55 | 4,07  | 1 | 2 | 2 | 73,2  | 4,96  |
| P24487 | ATP synthase subunit alpha, mitochondrial OS=Schizosaccharomyces pombe (strain 972 / ATCC 24843) GN=atp1 PE=3 SV=1 - [ATPA_SCHPO]               | 28,00 | 5,60  | 1 | 2 | 2 | 58,6  | 9,09  |
| O59865 | 40S ribosomal protein S24-B OS=Schizosaccharomyces pombe (strain 972 / ATCC 24843) GN=rps24b PE=2 SV=3 - [RS24B_SCHPO]                          | 26,76 | 17,16 | 1 | 2 | 2 | 15,5  | 10,92 |
| Q02061 | DNA-directed RNA polymerase II subunit RPB2 OS=Schizosaccharomyces pombe (strain 972 / ATCC 24843) GN=rpb2 PE=1 SV=2 - [RPB2_SCHPO]             | 23,71 | 1,82  | 1 | 2 | 2 | 137,8 | 6,83  |

Appendix Table S2: Fission yeast strains used in this study

| Strain number | Mating type | Leu Ura Ade His                    | Genotype                                                     | Origin            |
|---------------|-------------|------------------------------------|--------------------------------------------------------------|-------------------|
| LY5           | h+          | leu1-32                            |                                                              | lab stock         |
| LY6           | h-          | leu1-32                            |                                                              | lab stock         |
| LY11          | h+          | leu1-32 ura4D18                    |                                                              | lab stock         |
| LY12          | h-          | leu1-32 ura4D18                    |                                                              | lab stock         |
| LY112         | h+          | leu1-32 ura4D18 ade6-210           |                                                              | lab stock         |
| LY113         | h-          | leu1-32 ura4D18 ade6-210           |                                                              | lab stock         |
| LY1052        | h-          | leu1-32                            | <i>rrp6Δ::KanR</i>                                           | lab stock         |
| LY1053        | h+          | leu1-32                            | <i>rrp6Δ::KanR</i>                                           | lab stock         |
| LY1334        | h-          | leu1-32                            | <i>sen1Δ::KanR</i>                                           | lab stock         |
| LY2528        | h-          | leu1-32 ura? ade?                  | <i>rnh1D129N-GFP-KanR</i>                                    | lab stock         |
| LY2529        | h-          | leu1-32 ura? ade?                  | <i>rnh1D129N-GFP-KanR</i>                                    | lab stock         |
| LY2544        | h+          | leu1-32 ura4- ade6-210             | <i>rnh1D129N-GFP-KanR ARS::nmt1-RnhA::LEU2+</i>              | lab stock         |
| LY2545        | h-          | leu1-32 ura4- ade6-216             | <i>rnh1D129N-GFP-KanR ARS::nmt1-RnhA::LEU2+</i>              | lab stock         |
| LY2638        | h+          | leu1-32 ura4D18                    | <i>sen1Δ::NatR</i>                                           | lab stock         |
| LY2639        | h-          | leu1-32 ura4D18 ade6-210           | <i>sen1Δ::NatR</i>                                           | lab stock         |
| LY3159        | h+          | leu1-32 ura4D-                     | <i>rpc25-13myc-KanR sen1Δ::NatR</i>                          | lab stock         |
| LY3160        | h+          | leu1-32 ura4D- ade6-210            | <i>rpc25-13myc-KanR sen1Δ::NatR</i>                          | lab stock         |
| LY3161        | h+          | leu1-32 ura4D- ade6-210            | <i>rpc25-13myc-KanR sen1Δ::NatR</i>                          | lab stock         |
| LY3681        | h90?        | leu1-32 ura4D- ade6-216            | <i>rpc25-13myc-KanR rnh1Δ::HygroR rnh201Δ::KanR</i>          | lab stock         |
| LY3747        | h-?         | leu1-32 ura- ade6-216              | <i>rrp6Δ::KanR</i>                                           | lab stock         |
| LY3790        | h+          | leu1-32 ura4-                      | <i>sen1Δ::NatR rrp6Δ::KanR</i>                               | lab stock         |
| LY3791        | h-          | leu1-32 ura4- ade6-216             | <i>sen1Δ::NatR rrp6Δ::KanR</i>                               | lab stock         |
| LY3843        | h-          | leu1-32 ura4-                      | <i>sen1Δ::KanR</i>                                           | lab stock         |
| LY3844        | h+          | leu1-32 ura4-                      | <i>sen1Δ::KanR</i>                                           | lab stock         |
| LY3929        | h-          | leu1-32 ura4- ade6-210             | <i>sen1-3flag-NatR</i>                                       | lab stock         |
| LY3930        | h+          | leu1-32 ura4- ade6-210             | <i>sen1-3flag-NatR</i>                                       | lab stock         |
| LY3966        | h-          | leu1-32 ura4D18 ade6? his3D1       | <i>P81nmt1-dis3::KanR</i>                                    | François Bachand  |
| LY4127        | h-          | leu1-32 ura4D18 ade6-704           |                                                              | Richard J. Marais |
| LY4130        | h-          | ura4D18 ade6-704                   | <i>leu1-32::[DRTST::leu1+]</i>                               | Richard J. Marais |
| LY4156        | h-          | leu1-32 ade6-704                   | <i>sen1Δ::KanR</i>                                           | this study        |
| LY4157        | h+          | leu1-32 ade6-704                   | <i>sen1Δ::KanR</i>                                           | this study        |
| LY4164        | h+          | ade6-704                           | <i>sen1Δ::KanR leu1-32::[DRTST::leu1+]</i>                   | this study        |
| LY4165        | h-          | ade6-704                           | <i>sen1Δ::KanR leu1-32::[DRTST::leu1+]</i>                   | this study        |
| LY4174        | h-          | leu1-32 ura4- ade6-704             | <i>dbl8Δ::NatR</i>                                           | this study        |
| LY4175        | h+          | leu1-32 ura4- ade6-704             | <i>dbl8Δ::NatR</i>                                           | this study        |
| LY4183        | h+          | leu1-32 ura4- ade6-704             | <i>dbl8Δ::NatR leu1-32::[DRTST::leu1+]</i>                   | this study        |
| LY4184        | h-          | leu1-32 ura4- ade6-704             | <i>dbl8Δ::NatR leu1-32::[DRTST::leu1+]</i>                   | this study        |
| LY4285        | h-          | leu1-32 ura4D18 ade6-704           | <i>rpc37-3flag-NatR</i>                                      | this study        |
| LY4290        | h-          | leu1-32 ura4D18 ade6-704           | <i>rpc37-V189D-3flag-NatR</i>                                | this study        |
| LY4294        | h+          | leu1-32 ura4D18 ade6-704           |                                                              | this study        |
| LY4316        | h+          | leu1-32 ura4D18 ade6-704           | <i>rpc37-V189D-3flag-NatR</i>                                | this study        |
| LY4331        | h+          | ura4D18 ade6-704                   | <i>rpc37-3flag-NatR leu1-32::[DRTST::leu1+]</i>              | this study        |
| LY4332        | h+          | ura4D18 ade6-704                   | <i>rpc37-3flag-NatR leu1-32::[DRTST::leu1+]</i>              | this study        |
| LY4333        | h+          | ura4D18 ade6-704                   | <i>rpc37-3flag-NatR sen1Δ::KanR leu1-32::[DRTST::leu1+]</i>  | this study        |
| LY4334        | h+          | ura4D18 ade6-704                   | <i>rpc37-3flag-NatR sen1Δ::KanR leu1-32::[DRTST::leu1+]</i>  | this study        |
| LY4349        | h+          | leu1-32 ade6-704                   | <i>rpc37-3flag-NatR</i>                                      | this study        |
| LY4350        | h-          | leu1-32 ade6-704                   | <i>rpc37-3flag-NatR</i>                                      | this study        |
| LY4355        | h-          | ade6-704                           | <i>rpc37-V189D-3flag-NatR leu1-32::[DRTST::leu1+]</i>        | this study        |
| LY4356        | h-          | ade6-704                           | <i>rpc37-V189D-3flag-NatR leu1-32::[DRTST::leu1+]</i>        | this study        |
| LY4523        | h-          | leu1-32 ura4D                      | <i>sen1Δ::NatR</i>                                           | lab stock         |
| LY4524        | h+          | leu1-32 ura4D ade6-210             | <i>sen1Δ::NatR</i>                                           | lab stock         |
| LY4681        | h+          | leu1-32 ura4D18                    | <i>cdc2asM17</i>                                             | Iain Hagan        |
| LY4682        | h-          | leu1-32 ura4D18                    | <i>cdc2asM17</i>                                             | Iain Hagan        |
| LY4757        | h-          | ura4D- ade6-704                    | <i>cdc2asM17 rpc37-3flag-NatR</i>                            | lab stock         |
| LY4781        | h-          |                                    | <i>cdc2asM17 sen1Δ::KanR</i>                                 | lab stock         |
| LY4793        | h+          | leu1-32 ura4D18 ade6-210           | <i>arg10-2T</i>                                              | this study        |
| LY4795        | h+          | leu1-32 ura4D18 ade6-210           | <i>arg10-2T</i>                                              | this study        |
| LY4880        | h+          | leu1-32 ura4D18 ade6-210           | <i>sen1Δ::NatR arg10-2T</i>                                  | this study        |
| LY4881        | h+          | leu1-32 ura4D18 ade6-210           | <i>sen1Δ::NatR arg10-2T</i>                                  | this study        |
| LY4882        | h-          | leu1-32 ura4D18 ade6-210           | <i>sen1Δ::NatR arg10-2T</i>                                  | this study        |
| LY4938        | h-          | leu1-32 ura4D18 ade6-704/210?      | <i>rpc37-3flag-NatR arg10-2T</i>                             | this study        |
| LY4975        | h+          | leu1-32 ade6-704                   | <i>cdc2asM17 rpc37-3flag-NatR</i>                            | this study        |
| LY4976        | h-          | leu1-32 ade6-704                   | <i>cdc2asM17 rpc37-3flag-NatR</i>                            | this study        |
| LY4977        | h-          | leu1-32 ade6-704                   | <i>cdc2asM17 rpc37-3flag-NatR sen1Δ::KanR</i>                | this study        |
| LY4978        | h-          | leu1-32 ade6-704                   | <i>cdc2asM17 rpc37-3flag-NatR sen1Δ::KanR</i>                | this study        |
| LY5218        | h+          | leu1-32 ura4D-                     | <i>rpc25-13myc-KanR sen1Δ::NatR ARS::nmt1-RnhA::LEU2+</i>    | this study        |
| LY5219        | h+          | leu1-32 ura4D-                     | <i>rpc25-13myc-KanR sen1Δ::NatR ARS::nmt1-RnhA::LEU2+</i>    | this study        |
| LY5220        | h-          | leu1-32 ura4D- ade6-210            | <i>rpc25-13myc-KanR sen1Δ::NatR ARS::nmt1-RnhA::LEU2+</i>    | this study        |
| LY5221        | h+          | leu1-32 ura4D- ade6-210            | <i>rpc25-13myc-KanR sen1Δ::NatR ARS::nmt1-RnhA::LEU2+</i>    | this study        |
| LY5242        | h-          | leu1-32 ura4D- ade6-210 his2-Mat1M | <i>rpc25-13myc-KanR</i>                                      | Ken Noma          |
| LY5277        | h+          | leu1-32 ura4D-                     | <i>rpc25-13myc-KanR ARS::nmt1-RnhA::LEU2+</i>                | this study        |
| LY5278        | h-          | leu1-32 ura4D- his2-Mat1M          | <i>rpc25-13myc-KanR ARS::nmt1-RnhA::LEU2+</i>                | this study        |
| LY5357        | h-          | leu1-32 ura4D- ade6-210/216?       | <i>rnh1-D129N-GFP-KanR sen1Δ::NatR</i>                       | this study        |
| LY5358        | h-          | leu1-32 ura4D- ade6-210/216?       | <i>rnh1-D129N-GFP-KanR sen1Δ::NatR</i>                       | this study        |
| LY5359        | h+          | leu1-32 ura4D- ade6-210/216?       | <i>rnh1-D129N-GFP-KanR sen1Δ::NatR</i>                       | this study        |
| LY5360        | h+          | leu1-32 ura4D- ade6-210/216?       | <i>rnh1-D129N-GFP-KanR sen1Δ::NatR ARS::nmt1-RnhA::LEU2+</i> | this study        |
| LY5361        | h-          | leu1-32 ura4D- ade6-210/216?       | <i>rnh1-D129N-GFP-KanR sen1Δ::NatR ARS::nmt1-RnhA::LEU2+</i> | this study        |
| LY5362        | h+          | leu1-32 ura4D- ade6-210/216?       | <i>rnh1-D129N-GFP-KanR sen1Δ::NatR ARS::nmt1-RnhA::LEU2+</i> | this study        |
| LY5465        | h-          | leu1-32 ura4D- ade6-210/704?       | <i>rpc37-3flag-NatR sen1Δ::KanR arg10-2T</i>                 | this study        |
| LY5466        | h+          | leu1-32 ura4D- ade6-210/704?       | <i>rpc37-3flag-NatR sen1Δ::KanR arg10-2T</i>                 | this study        |
| LY5467        | h-          | leu1-32 ura4D- ade6-210/704?       | <i>rpc37-3flag-NatR sen1Δ::KanR arg10-2T</i>                 | this study        |
| LY5521        | h-          | leu1-32 ura4D- ade6-? his3D1       | <i>sen1Δ::NatR P81nmt1-dis3::KanR</i>                        | this study        |
| LY5522        | h+          | leu1-32 ura4D- ade6-?              | <i>sen1Δ::NatR P81nmt1-dis3::KanR</i>                        | this study        |
| LY5524        | h-          | leu1-32 ura4D- ade6-? his3D1       | <i>sen1Δ::NatR P81nmt1-dis3::KanR</i>                        | this study        |
| LY5724        | h+          | leu1-32 ura4D18 ade6-210           | <i>arg10-23T</i>                                             | this study        |
| LY5762        | h-          | leu1-32 ura4D- ade6-210/704?       | <i>cdc2asM17 rpc37-3flag-NatR sen1Δ::KanR arg10-23T</i>      | this study        |
| LY5763        | h+          | leu1-32 ura4D- ade6-210/704?       | <i>cdc2asM17 rpc37-3flag-NatR sen1Δ::KanR arg10-23T</i>      | this study        |
| LY5766        | h-          | leu1-32 ura4D- ade6-210/704?       | <i>cdc2asM17 rpc37-3flag-NatR arg10-23T</i>                  | this study        |
| LY5767        | h+          | leu1-32 ura4D- ade6-210/704?       | <i>cdc2asM17 rpc37-3flag-NatR arg10-23T</i>                  | this study        |
| LY5955        | h+          | leu1-32 ura4D- ade6-210            | <i>sen1-3flag-NatR arg10-TATAless</i>                        | this study        |
| LY5956        | h-          | leu1-32 ura4D- ade6-210            | <i>sen1-3flag-NatR arg10-TATAless</i>                        | this study        |
| LY5961        | h-          | leu1-32 ura4D- ade6-210            | <i>sen1Δ::NatR arg10-23T</i>                                 | this study        |
| LY5962        | h-          | leu1-32 ura4D- ade6-210            | <i>sen1Δ::NatR arg10-23T</i>                                 | this study        |
| LY5965        | h-          | leu1-32 ura4D- ade6-               | <i>rpc37-3flag-NatR arg10-TATAless</i>                       | this study        |
| LY5966        | h-          | leu1-32 ura4D- ade6-               | <i>rpc37-3flag-NatR arg10-TATAless</i>                       | this study        |
| FBY2103       | h+          | leu1-32 ura4-D18 his3-D1 ade6-M216 | <i>Sen1-HTP::kanMX6</i>                                      | this study        |
| FBY2209       | h+          | leu1-32 ura4-D18 his3-D1 ade6-M216 | <i>Rpc1-TAP::natMX6</i>                                      | this study        |
| FBY2210       | h+          | leu1-32 ura4-D18 his3-D1 ade6-M216 | <i>Rpc2-TAP::natMX6</i>                                      | this study        |
| FBY2212       | h?          | leu1-32 ura4-D18 his3-D1 ade6?     | <i>sen1Δ::kanMX6 Rpc1-TAP::natMX6</i>                        | this study        |
| FBY2213       | h?          | leu1-32 ura4-D18 his3-D1 ade6?     | <i>sen1Δ::kanMX6 Rpc2-TAP::natMX6</i>                        | this study        |
| LY3811        | h-          | leu1-32 ura4-                      | <i>dbl8Δ::NatR</i>                                           | this study        |
| LY3812        | h+          | leu1-32 ura4-                      | <i>dbl8Δ::NatR</i>                                           | this study        |
| LY3815        | h-          | leu1-32 ura4D18 ade6-210           | <i>dbl8-3flag-NatR</i>                                       | this study        |
| LY3859        | h-          | leu1-32 ura4- ade6-210             | <i>sen1-GFP-KanR dbl8Δ::NatR</i>                             | this study        |
| LY3860        | h-          | leu1-32 ura4- ade6-210             | <i>sen1-GFP-KanR dbl8Δ::NatR</i>                             | this study        |
| LY3861        | h+          | leu1-32 ura4- ade6-210             | <i>sen1-GFP-KanR dbl8Δ::NatR</i>                             | this study        |
| LY3921        | h+          | leu1-32 ura4- ade6-210             | <i>rpa43-GFP-KanR</i>                                        | this study        |
| LY3923        | h-          | leu1-32 ura4- ade6-210             | <i>rpa43-GFP-KanR dbl8-3flag-NatR</i>                        | this study        |
| LY6180        | h+          | leu1-32 ura4D ade6-210/704?        | <i>rpc37-3flag-NatR sen1Δ::KanR thr10-20T</i>                | this study        |
| LY6211        | h+          | leu1-32 ura4D ade6-210/704?        | <i>sen1Δ::KanR thr10-20T</i>                                 | this study        |

**Appendix Table S3: Primers used in this study**

| Figure                              | Chromosome site                | Name on figure | Use         | Primer name                | Primer sequence                                     |
|-------------------------------------|--------------------------------|----------------|-------------|----------------------------|-----------------------------------------------------|
| 1F/2A/3C                            | 18S ribosomal RNA              | 18S            | ChIP        | 18SqL1<br>18SqR1           | tttctaggaccgccgtaatg<br>tgcttctcgagtagtctgctc       |
| 1F                                  | 28S ribosomal RNA              | 28S            | ChIP        | 28SqL1<br>28SqR1           | cocctgtcgcttaattggac<br>tacattccggcaccttaacc        |
| 1F/2A                               | SPCC13B11.01                   | adh1           | ChIP        | adh1ORFqL1<br>adh1ORFqR1   | tcaccatgttcaactgttcc<br>cgggaaacagttatcaagagc       |
| 1F                                  | SPAC27E2.11c                   | 27E2.11c       | ChIP        | 27E2.11cqL1<br>27E2.11cqR1 | tccccgttttagcatggaag<br>caagggcgtgtttgtcactg        |
| 1F                                  | SPBC19C2.07                    | fba1           | ChIP        | fba1qL1<br>fba1qR1         | tcaagaccaccaacgacaag<br>agcgaattgggtatcagtg         |
| 1F                                  | SPCC417.08                     | tef3           | ChIP        | Tef3 qL1<br>Tef3 qR1       | ATGTTGCCTGGTTGGAGAAC<br>AACGTGGTCCAAGAAACCAG        |
| 1F                                  | SPBC18H10.14                   | rps1601        | ChIP        | rps1601qL1<br>rps1601qR1   | cggtctgtcaacaaaagtc<br>aacgggtggctgctacacag         |
| 1F/1G/2A/2C/3B/3C/4E/5B/6B/6C/6D/6E | SPCTRNAARG.10                  | arg10.1        | ChIP/RTqPCR | arg10qL1<br>arg10qR1       | GGTGTGTAGCCCTAATGGTTAAGG<br>GAGTGTGACAGGACTCGAACC   |
| 1G/4E/6B/6D                         | SPCTRNAARG.10                  | arg10.2        | ChIP        | arg10qL2<br>arg10qR2       | GGAAGGATACAATATCCACAACG<br>CTGTGTATCCATCCACTACGG    |
| 1G/4E/6B/6D                         | SPCTRNAARG.10                  | arg10.3        | ChIP        | arg10 -300 FW<br>arg10qR3  | TGCGACTCAGCATAAAGGTG<br>GGCATTCTGTCGATTTTGC         |
| 1G/4E/6B/6D                         | SPCTRNAARG.10                  | arg10.4        | ChIP        | arg10qL4<br>arg10qR4       | AAAGCCGCTTTTCGTTAACAC<br>CTGCTTGACCAAGCTTTTGTG      |
| 1G/4E/6B/6D                         | SPCTRNAARG.10                  | arg10.5        | ChIP        | arg10qL5<br>arg10qR5       | ACCAAAGTCCCGATACAAC<br>GCAAACAGAGTCCAATTGAGG        |
| 2C/                                 | SPCTRNAARG.10                  | arg10          | RTqPCR      | arg10RTT1                  | CAATATTTCTATTGCATGTTGACAG                           |
| 1F/1G/2A/3B/3C/4E/                  | SPCTRNATHR.10                  | thr10.1        | ChIP        | thr10qL1<br>thr10qR1       | CAATCAACGTTGCCCTATG<br>ATACAAATTGCCCCACTCG          |
| 4E                                  | SPCTRNATHR.10                  | thr10.2        | ChIP        | thr10qL2<br>thr10qR2       | ATTAGGAGGAGCATCGTACAGC<br>CACATAAAAGTGATATGCAAAAACG |
| 4E                                  | SPCTRNATHR.10                  | thr10.4        | ChIP        | thr10qL4<br>thr10qR4       | AGTCACGGACTTGGTCTTTACC<br>TTCTTTGCACCCATAGCAC       |
| 4E                                  | SPCTRNATHR.10                  | thr10.5        | ChIP        | thr10qL5<br>thr10qR5       | AATGAGATTATCCAGCGTTC<br>GCAGGTACCGTAATAGCCTTC       |
| 4E                                  | SPCTRNATHR.10                  | thr10.6        | ChIP        | thr10qL6<br>thr10qR6       | GTGGATGACTAAACCACGTC<br>ACGGATGACAGTAAAGGAATG       |
| 1F/2A/2C/3B/3C/4E/5B                | SPBTRNATYR.04                  | tyr04          | ChIP/RTqPCR | tyr04FW<br>tyr04RV         | TGGTGTAGTTGGTTATCACATCC<br>AATCTCCTGAGCCAGAATCG     |
| 4E                                  | SPBTRNATYR.04                  | lys09          | ChIP        | lys09qL1<br>lys09qR1       | GCTTTATGAGCGGCCTAAC<br>GAGCATTAGGTTTTTGGCGTAG       |
| 4E                                  | SPBTRNATYR.04                  | tyr04.2        | ChIP        | tyr04qL2<br>tyr04qR2       | ttgccctgtcatcctatctc<br>tgaatttagcagctttctctcaa     |
| 4E                                  | SPBTRNATYR.04                  | tyr04.3        | ChIP        | tyr04qL3<br>tyr04qR3       | TCCTTTACGCCCTTTTC<br>ACAATCCTGTTCAAATAGCC           |
| 5B                                  | SPBTRNATYR.04                  | tyr04          | RTqPCR      | tyr04RTT2                  | TACCACAAGTAGCCAGGGTG                                |
| 1F/2A/3B/3C/5B                      | SPATRNPAPRO.02                 | pro02          | ChIP/RTqPCR | pro02qL1<br>pro02qR1       | ACATACCTCTTTGGGTAATCC<br>GGGCTAACCAAGGATTCG         |
| 5B                                  | SPATRNPAPRO.02                 | pro02          | RTqPCR      | pro02RTT1                  | GGTAATCAAGCAAGGTGTAAGG                              |
| 5C                                  | SPATRNPAPRO.02                 | pro02          | Northern    | pro02qR3                   | TCTAAACTCAGCATACAAGTGGGG                            |
| 1F/2A/3B/3C                         | SPCTRNAMET.07                  | met07          | ChIP        | c417qL1<br>c417qR1         | AGGTTCAAATCCTGCTGGTG<br>TGGACCTACGGTATGAG           |
| 1F/2A/3B/3C                         | 5S ribosomal RNA               | 5S             | ChIP        | 5SqL1<br>5SqR1             | TAGGGAAAAACCAAGTTCC<br>TTCCATGTTGTCTCCAACC          |
| 1F/2A/3B/3C                         | SPRRNA.20                      | 5S20           | ChIP        | 5S20qL2<br>5S20qR2         | CATGGCTAAATTTGTTCAAATCC<br>GTGGTAATTCGCCATTGTC      |
| 1F/2A/3B/3C                         | snu6                           | snu6           | ChIP        | snu6qL1<br>snu6qR1         | GATCTTCGGATCACTTTGGTC<br>ATGTCGCAAGTGTATCCTTTG      |
| 1F/2A                               | Chromosome-Organizing Clamp 3* | COC3           | ChIP        | COC3qL<br>COC3qR           | CGAATCGCCCTTATGGATTC<br>ATGCTACATCCCGATGATCC        |
| 1F/2A                               | Chromosome-Organizing Clamp 4* | COC4           | ChIP        | COC4qL<br>COC4qR           | TGTCGATATTAGACCGAGCAAC<br>TTGCAACCCACAGACTTTTGC     |
| 1F/2A                               | Chromosome-Organizing Clamp 5* | COC5           | ChIP        | COC5qL<br>COC5qR           | CCGAATTGACGCTAGTCTCC<br>TTGTTGCTACCAGCGTATCC        |
| 1F/2C/5B/6C/6E                      | act1                           | act1           | ChIP/RTqPCR | act1qL0<br>act1qR0         | aacgctcgtttccgatagtg<br>acgtcgctttggactttgag        |
| 2C                                  | SPBTRNAARG.05                  | arg05          | RTqPCR      | arg05qL2<br>arg05qR2       | ATGGTAGCGCATCTCATTCC<br>ACAATCTTACAGCAGGGACTC       |
| 2C                                  | SPBTRNAARG.05                  | arg05          | RTqPCR      | arg05RTT2                  | CATGAGCAAAACAAAATACCACA                             |
| 6C                                  | SPCTRNASER.09                  | ser.09         | RTqPCR      | ser.09 qL1<br>ser.09 qR1   | AGAAATCTGTTGCGGTCTCC<br>CCGTAAGTGGATGGATAACAGC      |

\* see Noma et al., 2006



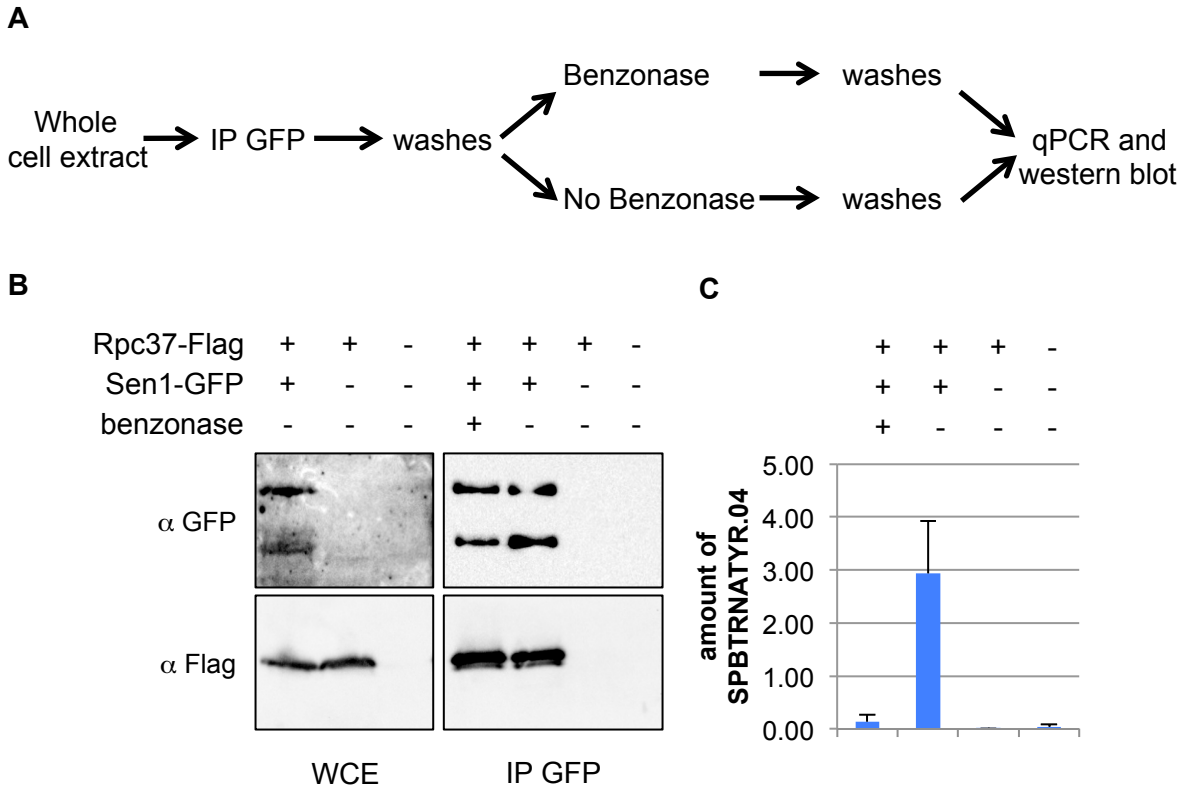

**Appendix Figure S1: The Sen1/RNAP3 physical association is not mediated by RNA or DNA.**

A. Principle of the experiment.

B. Result of the Sen1-GFP immuno-precipitation. Sen1 was difficult to detect in the whole cell extract (WCE) and as a result the blot was exposed for longer than in the IP.

C. The DNA co-immunoprecipitated with Sen1 was quantified by qPCR, using the RNAP3-transcribed SPBTRNATYR.04 locus as reference. This confirmed that the benzonase treatment was efficient.

## Appendix Figure S2

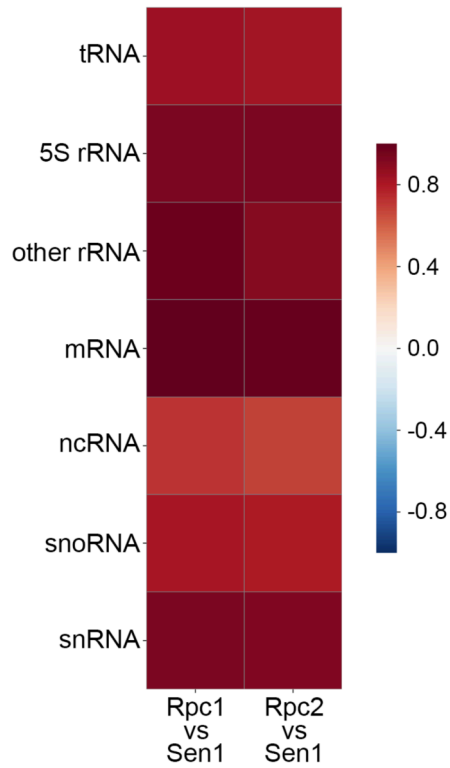

**Appendix Figure S2: Correlation analysis of ChIP-seq data from Sen1 and RNAP3 for different classes of genes.** Pairwise Pearson correlation analysis of read coverage between Sen1 and Rpc1/Rpc2 for the indicated gene types.

### Appendix Figure S3

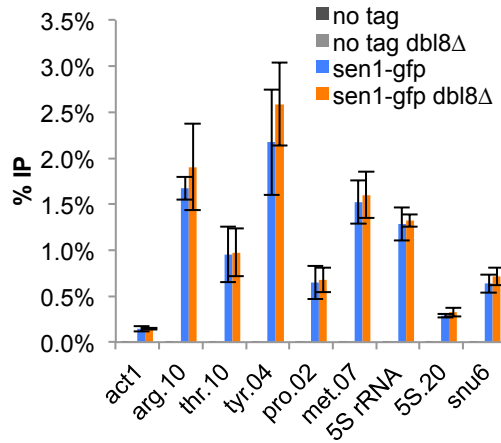

**Appendix Figure S3: Lack of Dbl8 does not impact the recruitment of Sen1 at RNAP3-transcribed genes.** ChIP-qPCR analysis of GFP-tagged Sen1 in the indicated genotypes and at the indicated loci in a population of cycling cells (mean  $\pm$  standard deviation from 3 biological replicates).

## Appendix Figure S4

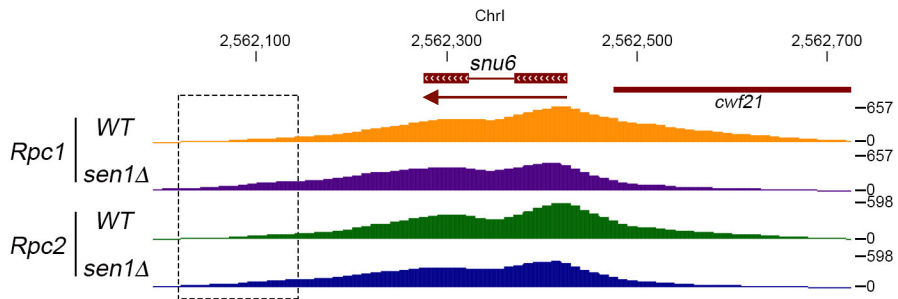

**Appendix Figure S4: Lack of Sen1 results in modest transcription termination defects at *snu6*.** Snapshots of ChIP-seq signals of the RNAP3 subunits Rpc1 and Rpc2 in the presence or absence of Sen1 across the *snu6* locus. Boxed region highlights the increased density of reads downstream of *snu6* in the absence of Sen1.

## Appendix Figure S5

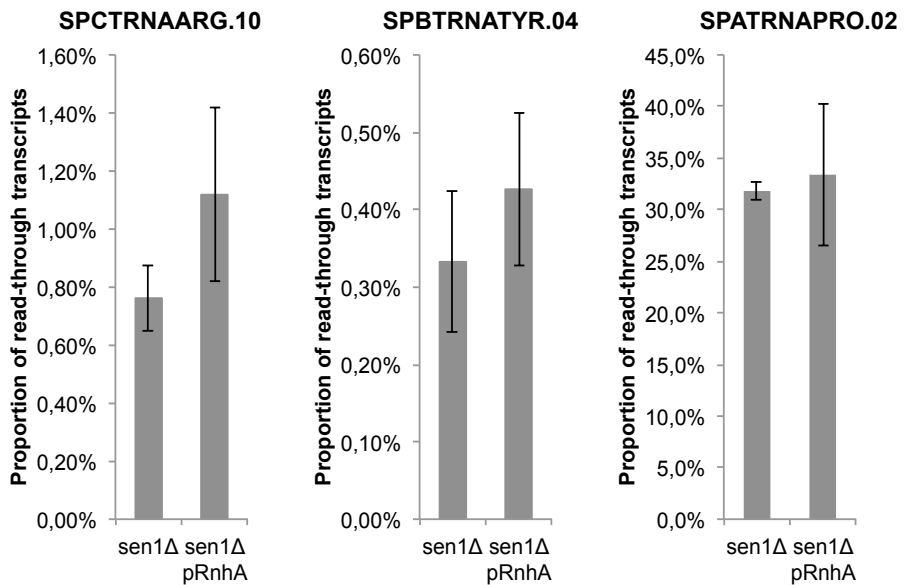

**Appendix Figure S5: RnhA expression does not change the proportion of read-through transcripts in the absence of Sen1.** Strand-specific RT-qPCR was used to quantify the levels of read-through transcripts (see Methods). The mean  $\pm$  standard deviation from 3 biological replicates is represented here.
